# Supplementary material for: Graphene oxide hydrogel improved sensitivity in one-dimensional photonic crystals for detection of beta-glucan
Source: Royal Society of Chemistry journal article supplement (doi:10.1039/c5ra12155h), 2015-01-01
Supplement: c5ra12155h1.pdf [file c5ra12155h1.pdf]

## Graphene Oxide Hydrogel Improved Sensitivity In one-dimensional photonic crystals for detection of beta-glucan

Jiaoyu Ren,<sup>a</sup> Hongyun Xuan,<sup>a</sup> Cihui Liu,<sup>a</sup> Chong Yao,<sup>a</sup> Yanxi Zhu,<sup>a</sup> Xuefan Liu,<sup>a</sup> Liqin Ge<sup>a</sup>

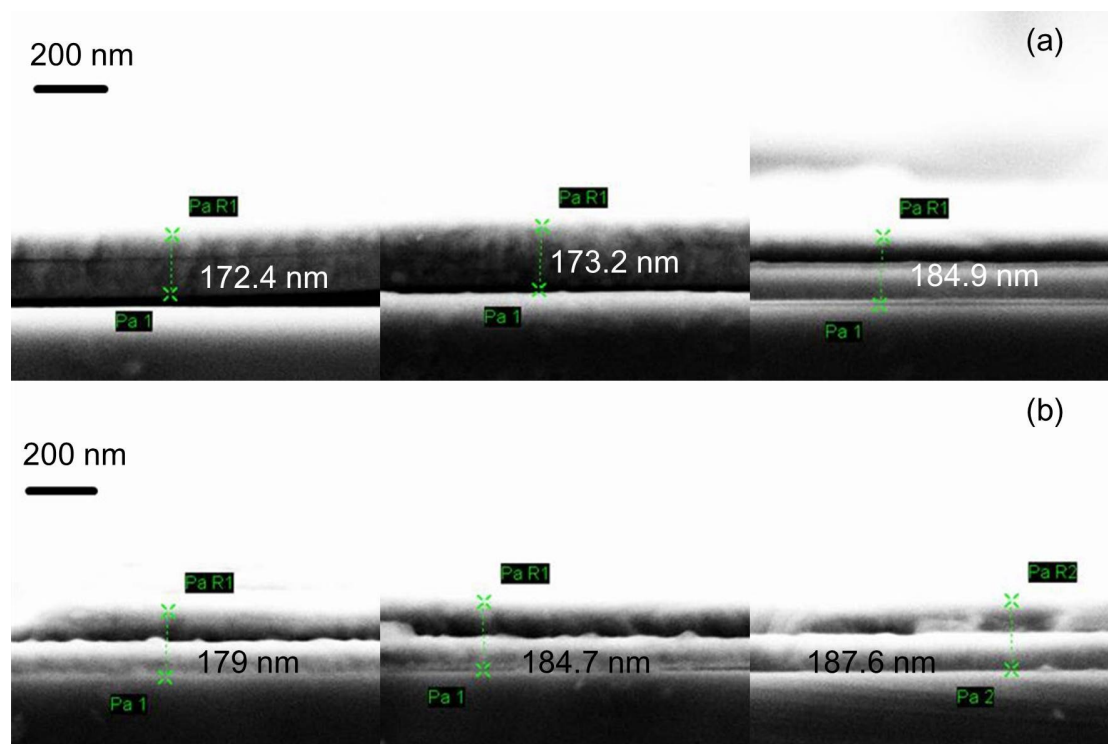

Figure S1 SEM images of TiO<sub>2</sub>/GO hydrogel 1DPhC with a PANI defect before (a) /after (b) detecting beta-glucan.
